# Supplementary material for: Mast cells decrease efficacy of anti-angiogenic therapy by secreting matrix-degrading granzyme B
Source: PubMed Central journal article supplement (PMC5559596; doi:10.1038/s41467-017-00327-8), 2017-08-16
Supplement: 41467_2017_327_MOESM1_ESM.pdf [file 41467_2017_327_MOESM1_ESM.pdf]

File Name: Supplementary Information

Description: Supplementary Figures, Supplementary Table, Supplementary Methods and Supplementary References

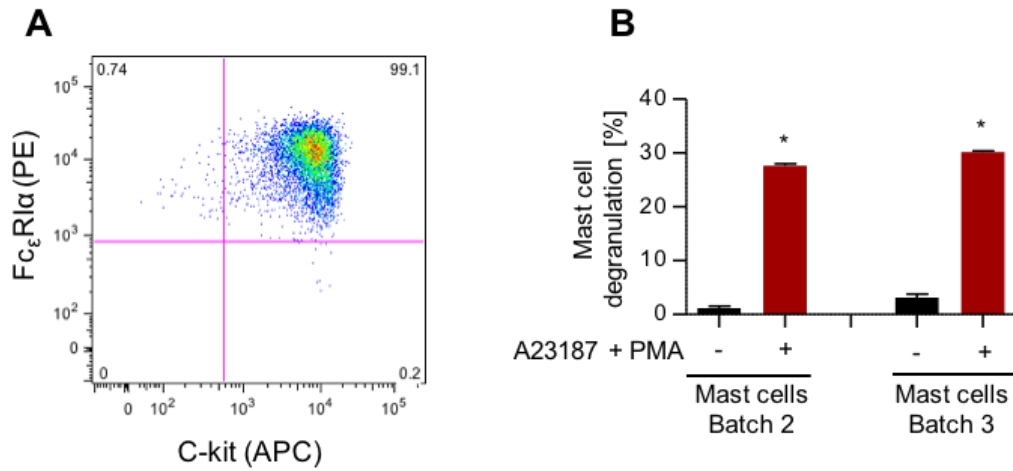

**Supplementary Figure 1: *In vitro* differentiation of mast cells from murine bone marrow.**

(A) Flow cytometric expression analysis of the mast cell marker Fc $\epsilon$ R1 $\alpha$  and c-kit. Double positive cells were considered fully mature mast cells. (B) Biochemical assay that determines  $\beta$ -hexosaminidase activity in mast cell supernatans. Mast cells were treated with or without 40  $\mu$ M A23187 and 50 ng/ml PMA to induce degranulation. Degranulation is analyzed by quantification of extra- and intracellular levels of  $\beta$ -hexosaminidase. Extracellular enzyme levels are displayed as percent of total  $\beta$ -hexosaminidase (n=3; \*p<0.05, two-tailed t-test). Results are shown as representative means  $\pm$  s.e.m.

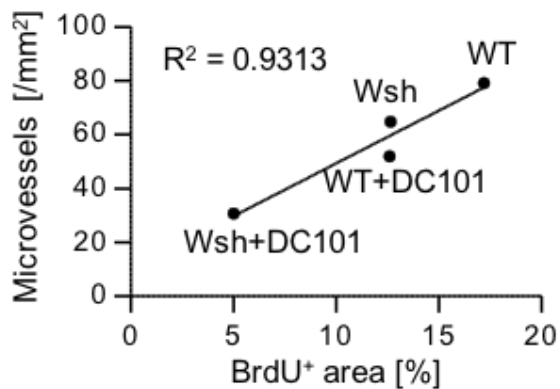

**Supplementary Figure 2: Microvessel density correlates with the proliferative fraction of tumors.**

Panc02 tumor cells were injected into the flanks of C57Bl/6J (WT) or mast cell deficient (Wsh) mice and animals received treatment with placebo or 20 mg/kg DC101 (n=8/8/5/5; \*p<0.05;  $r^2=0.9313$ ; Pearson correlation). Histomorphometric quantification of CD31<sup>+</sup> microvessels and BrdU<sup>+</sup> tumor area was performed and treatment-induced reduction of microvessel density was correlated with the reduction in BrdU<sup>+</sup> tumor area. Each dot represents the mean of a treatment group with n≥5 WT or Wsh animals receiving either placebo DC101 (20 mg/kg) treatment. Results are shown as representative means ± s.e.m.

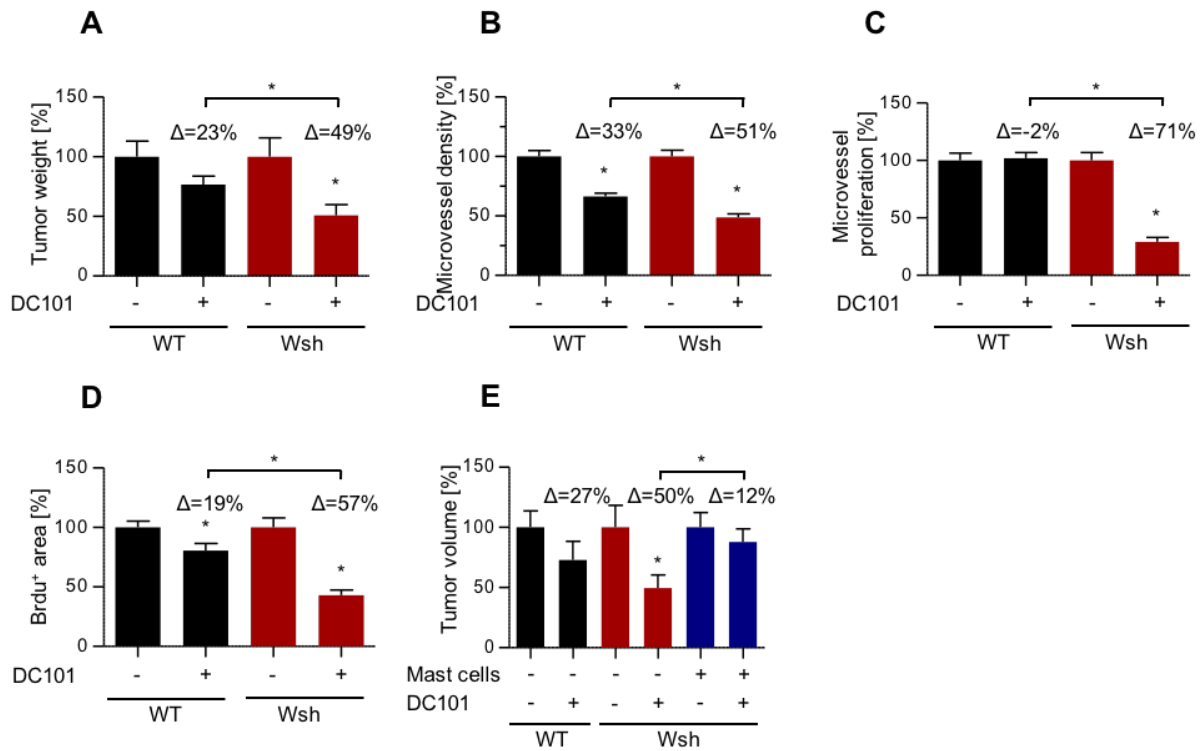

**Supplementary Figure 3: Mast cell-deficiency enhances the relative efficacy of AAT.**

(A) Relative weight of end stage Panc02 tumors, which were injected into the flanks of C57Bl/6J (WT) or MC deficient (Wsh) mice and received treatment with placebo or 20 mg/kg DC101 (n=5/5/5/5; \*p<0.05; two-way ANOVA). (B-D) Relative histomorphometric quantification of CD31+ total microvessels (B) or CD31+ BrdU+ proliferating microvessels (C) and of BrdU+ proliferating tumor area (D) in Panc02 tumor sections (n=8/8/5/5; \*p<0.05; one-way ANOVA). (E) Relative tumor volume of end stage Panc02 tumors with or without adoptive transfer of MC. After randomization animals received treatment with placebo or 20 mg/kg DC101 (n=9/9/7/6/7/5; \*p<0.05; one-way ANOVA). Results are shown as representative means  $\pm$  s.e.m.

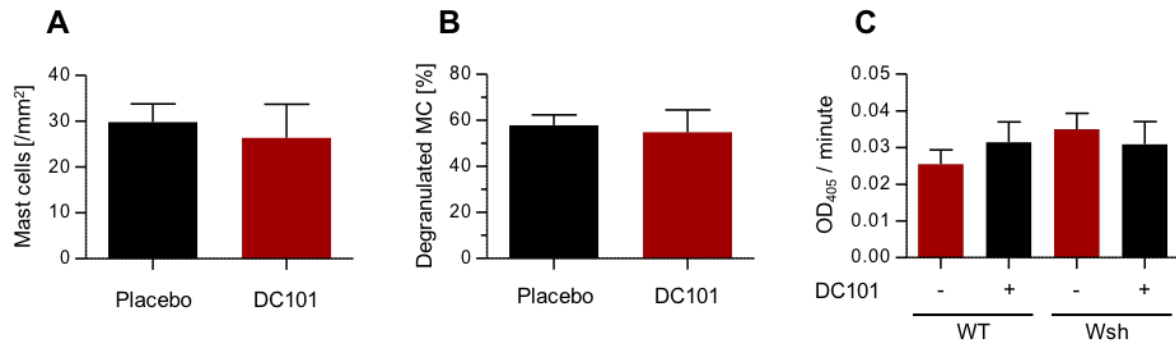

**Supplementary Figure 4: Treatment with DC101 does not reduce the number, degranulation status or MCPT8 expression of mast cells.**

(A+B) Panc02 tumor cells were injected into the flanks of C57Bl/6J (WT) mice and animals received treatment with placebo or 20 mg/kg DC101 (n=5/5; two-tailed t-test). Mast cell number (A) and degranulation status (B) was determined via histomorphometric analysis of tryptase<sup>+</sup> cells. (C) Biochemical assay measuring substrate cleavage (Suc-AAPF-ZBzl) by mast cell protease 8 in tumor lysates. Results are depicted as changes in optical density (405 nm) per minute (n=8/8/5/5; one-way ANOVA). Results are shown as representative means ± s.e.m.

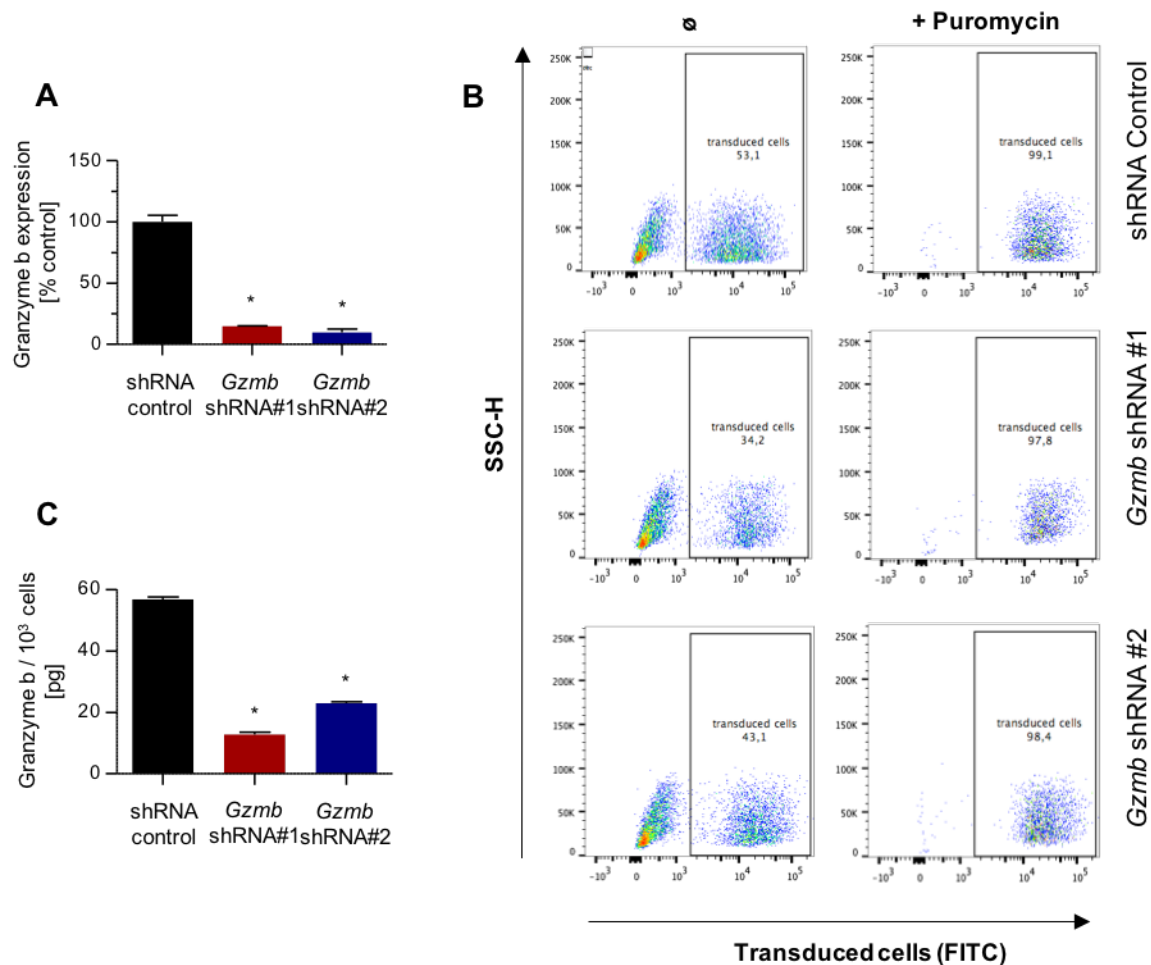

**Supplementary Figure 5: Lentiviral knock down of granzyme b in primary bone marrow derived mast cells.**

(A) Primary BMDC were transduced with lentiviral particles containing either *Gzmb* shRNA #1-4 or a control construct. Transduced cells were sorted using flow cytometry and qRT-PCR was performed to measure mRNA levels of *Gzmb*. Data were normalized to *Gapdh* as a housekeeping gene and displayed as % of control-transduced cells (n=3; \*p<0.05; one-way ANOVA). (B) Transduced primary BMDC that showed the most efficient knock down of *Gzmb* were expanded and selected by adding 5 µg/ml puromycin for 4 days. To determine the purity of cells, cultures were analyzed in a flow cytometer with and without puromycin. (C) Supernatants of mast cell cultures with the most efficient knock down on *Gzmb* were conditioned for 5 days before measuring GZMB levels via ELISA. Data represent the average GZMB-production per 1000 cells (n=3; \*p<0.05; one-way ANOVA). Results are shown as representative means ± s.e.m.

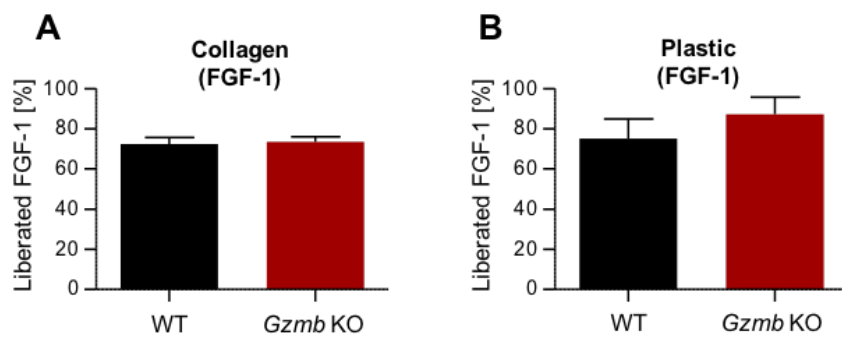

**Supplementary Figure 6: Release of FGF-1 by mast cell-derived GZMB is ECM specific.**

Mobilization of FGF-1 from a collagen matrix (A) or from plastic (B) using conditioned media from WT or *Gzmb* KO BMMC. Determination of protein concentrations was performed by ELISA (n=3; \*p<0.05; two-tailed t-test). Results are shown as representative means  $\pm$  s.e.m.

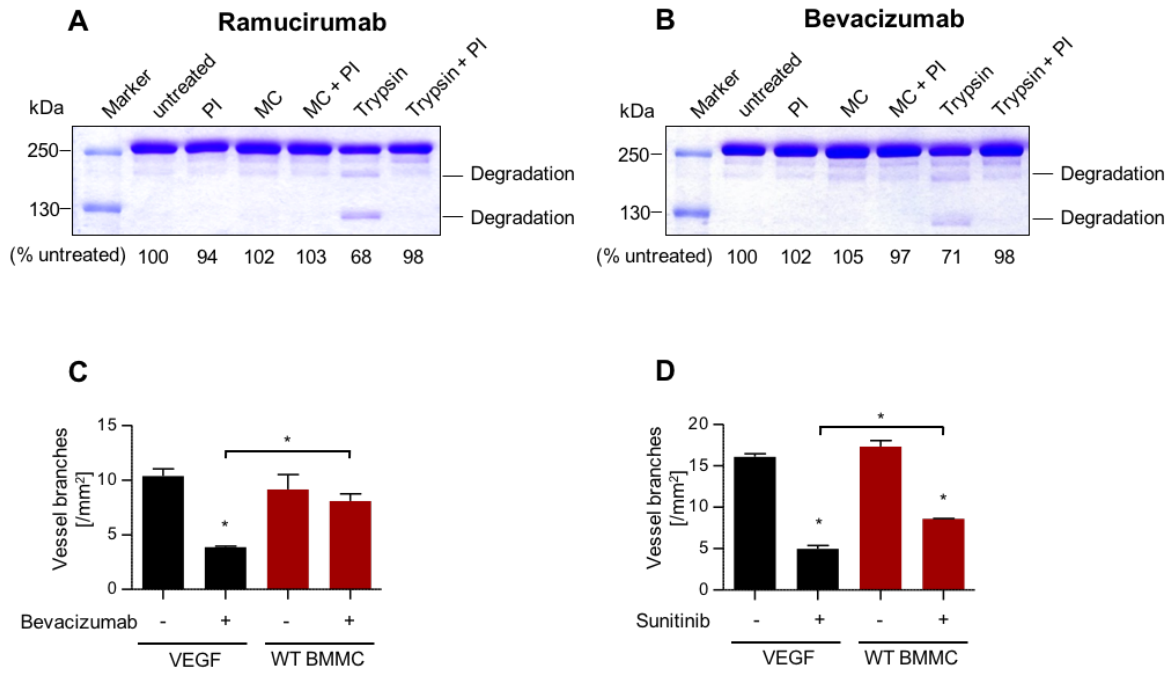

**Supplementary Figure 7: Mast cells induce VEGFA-independent tube formation.**

(A+B) Immunoprecipitation of ramucirumab (A) or bevacizumab (B) after incubation with MC-conditioned media (MC) or trypsin with and without a pan-protease inhibitor (PI; Complete®, Roche). Full-length antibody was visualized on a coomassie-stained acrylamide gel. (C) Tube formation assays using 200 ng/ml VEGFA or conditioned media from WT bone marrow-derived mast cells (WT BMMC) with and without 2 µg/ml bevacizumab (C) or 25 nM sunitinib (D) (n=3; \*p<0.05; one-way ANOVA). Results are shown as representative means ± s.e.m.



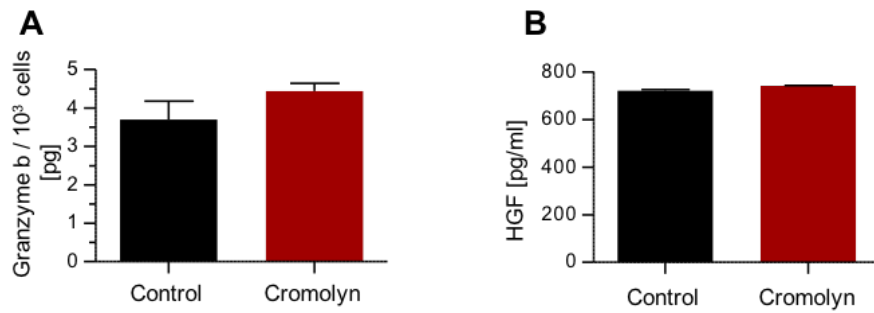

**Supplementary Figure 8: Treatment of mast cells with cromolyn does not reduce release of GZMB or HGF.**

(A+B) BMNC were treated with 40  $\mu$ M cromolyn *in vitro*. Supernatants were assayed for the presence of GZMB (A) or HGF (B) using ELISA (n=3; \*p<0.05; two-tailed t-test). Results are shown as representative means  $\pm$  s.e.m.

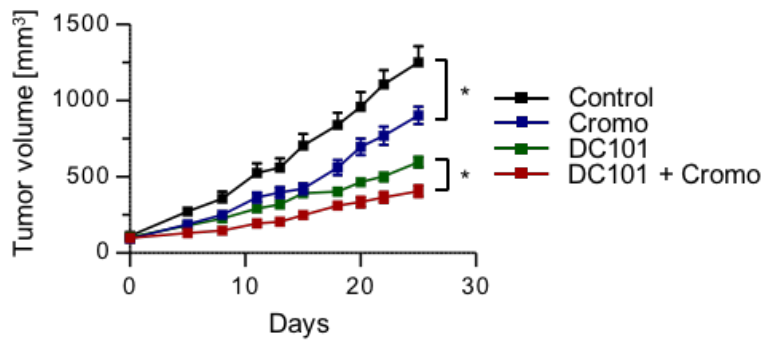

**Supplementary Figure 9: Cromolyn treatment sensitizes BxPC3 tumors for anti-angiogenic therapy.**

Kinetic of subcutaneously growing BxPC3 tumors expressed as tumor volume. BxPC3 tumor cells were transplanted into the flanks of immunocompromised NSG mice. After randomization animals were treated with 20 mg/kg DC101 or 25 mg/kg cromoglicin in single and combinatorial therapy (n=8/8/6/6; \*p<0.05). Results are shown as representative means  $\pm$  s.e.m.

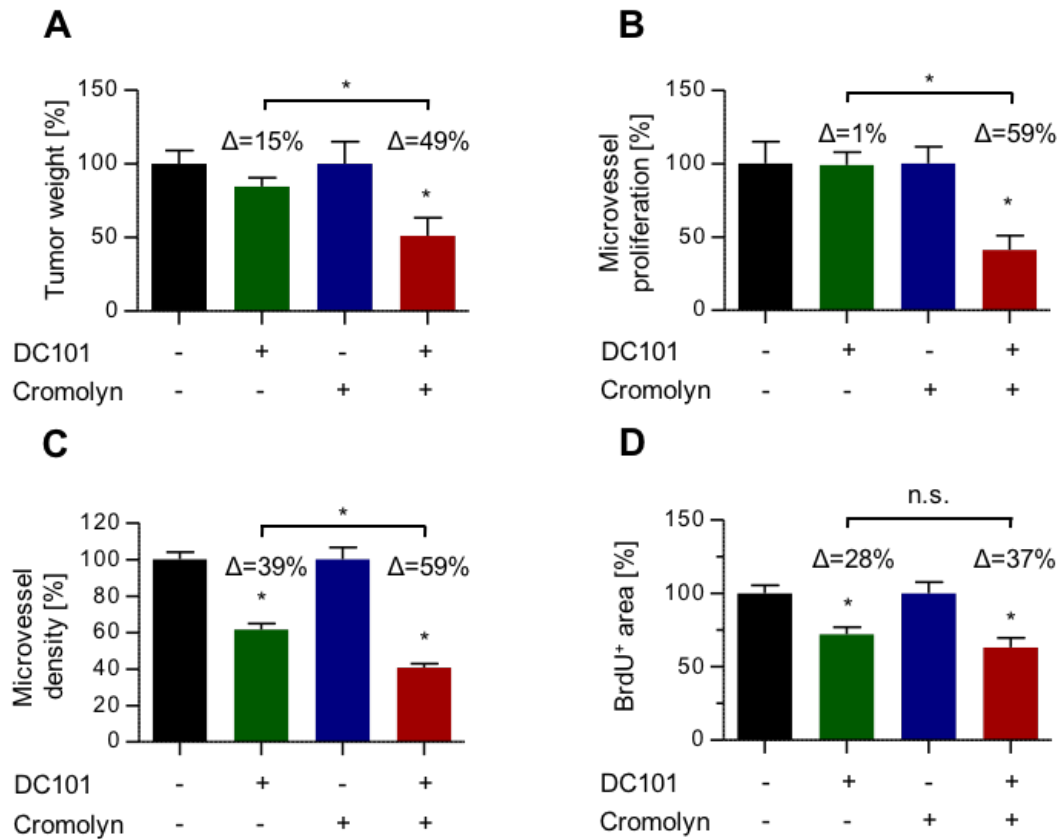

**Supplementary Figure 10: Pharmacological inhibition of mast cell-function enhances the relative efficacy of AAT.**

Panc02 tumor cells were transplanted into the flanks of C57Bl/6J mice. After randomization, animals were treated with 20 mg/kg DC101 or 25 mg/kg cromolyn in single and combinatorial therapy. (A) Relative weight of end stage Panc02 tumors at day of sacrifice (n=8/7/8/7; \*p<0.05; one-way ANOVA). (B-D) Relative histomorphometric quantification of BrdU+ CD105+ proliferating (B) or CD31+ total (C) tumor microvessels and of BrdU+ tumor area (D) (n=8/7/8/7; \*p<0.05; one-way ANOVA). Results are shown as representative means ± s.e.m.

## **SUPPLEMENTARY METHODS**

### **ANIMALS**

Generation of mast cell deficient Kit<sup>W-sh</sup>/HNihrJaeBsmJ (Wsh) mice was described <sup>1</sup>. The strain was backcrossed into C57BL/6J background for at least 10 generations and obtained from Adrian Liston (VIB, Leuven, Belgium). Immunodeficient NOD.Cg-Prkdc<sup>scid</sup> Il2rg<sup>tm1Wjl</sup>/SzJ mice (NSG) were obtained from Charles River Laboratories (Sulzfeld, Germany). Breeding of Wsh and NSG mice was carried out in homozygosity in our animal facility (UKE, Hamburg, Germany). C57BL/6 control mice were ordered externally from Charles River Laboratories (Sulzfeld, Germany). Experiments were performed with 7-12 week old female mice.

### **CELLS AND CULTURE CONDITIONS**

Panc02 and EL4 cells were a gift from Prof. Dr. Peter Carmeliet (VIB Vesalius Research Center, KU Leuven). BXPC3 cells were a gift from Prof. Dr. Udo Schumacher (University Medical Center Hamburg-Eppendorf, Hamburg). No cell line used in this study is listed in the ICLAC database of commonly misidentified cell lines. Human BxPC3 cells were authenticated using STR-analysis. All cell lines were routinely tested for contamination with mycoplasma on a regular basis. All cell cultures were maintained at 37°C and 5 % CO<sub>2</sub> in a humidified atmosphere and not cultured longer than 15 passages before experimental use. Murine PancO2 and EL4 cells were cultured in RPMI 1640 medium supplemented with 10 % FCS, 2 mM L-glutamine, 100 U/ml penicillin, 100 µg/ml streptomycin. Human umbilical vein endothelial cells (HUVEC) were cultured in EBM-2 Medium (Lonza Group AG, Basel, Switzerland) supplemented with 2 % FCS, 2 mM L-glutamine, 100 U/ml penicillin, 100 µg/ml streptomycin and a complete set of EGM-2 growth factors (Lonza Group AG, Basel Switzerland). Human BXPC3 cells derived from a patient's pancreatic ductal adenocarcinoma were cultured in RPMI 1640 medium supplemented with 10 % FCS, 2 mM L-glutamine, 100 U/ml penicillin, 100 µg/ml streptomycin. Primary murine bone marrow derived mast cells (BMMC) were generated as described <sup>2</sup> and cultured in DMEM medium supplemented with 10 % FCS, 2 mM L-glutamine,

100 U/ml penicillin, 100 µg/ml streptomycin, 50 µM β-mercaptoethanol, 10 ng/ml murine IL-3, 10 mM HEPES and 1 mM sodium-pyruvate.

### LENTIVIRAL KNOCK DOWN OF *GZMB* IN BMMC

To knock down *Gzmb* in BMMC, MISSION shRNA pLKO.1 plasmids harboring two different shRNAs against *Gzmb* were obtained (SHCLND-NM\_013542; Sigma-Aldrich, Taufkirchen, Germany). The entire U6 promotor and the shRNA region were amplified from plasmids using the primers p192\_GzmB\_KD and p263\_GzmB\_KD (see below) by PCR. The primers introduced restriction sites for XbaI and Sall, therefore PCR products were cut with XbaI and Sall while the plasmid LeGO-G-Puro<sup>+</sup> 3 was cut with XbaI and XhoI. Cut plasmid and PCR product were ligated in a 1:3 molar ratio using T4 ligase (Life technologies, Carlsbad, CA, USA) at 16°C for 90 min.

The resulting ligation product was transformed into One Shot TOP10 Chemically Competent E.coli (Life technologies, Carlsbad, CA, USA). Bacterial clones were picked from ampicillin-containing agar plates and plasmids were purified and analyzed for correct insert via sequencing of cloned regions. VSV-G pseudotyped viral particles were generated as described 4 and used for transduction of primary BMMC according to standard techniques. Transduced BMMC were purified using flow cytometric sorting (DAPI<sup>-</sup> eGFP<sup>+</sup> FcεR1α<sup>+</sup> c-kit<sup>+</sup>) or selected for 4 days with 5 µg/ml puromycin before experiments were performed. Knock down of *GzmB* was controlled by RT-qPCR. Primers for RT-qPCR are shown in the table below.

**Supplementary Table 1: Oligonucleotides for qRT-PCR and cloning.**

| Name           | Purpose                | Sequence                                      |
|----------------|------------------------|-----------------------------------------------|
| p192_GzmB_KD   | Cloning of gzmB shRNAs | 5'-TAC TGC CAT TTG TGT CGA CGT CGA GAA TTC-3' |
| p263_GzmB_KD   | Cloning of gzmB shRNAs | 5'-GTA TAT CTA GAG GCC GCC CCC TTC ACC GAG-3' |
| rt_m_GzmB_fwd  | qRT-PCR                | 5'-ACA AAG GCA GGG GAG ATC AT-3'              |
| rt_m_GzmB_rev  | qRT-PCR                | 5'-CGA ATA AGG AAG CCC CCA CA-3'              |
| rt_m_Gapdh_fwd | qRT-PCR                | 5'-GGT GAA GGT CGG TGT GAA C -3'              |
| rt_m_Gapdh_rev | qRT-PCR                | 5'-GGG GTC TCG CTC CTG GAA -3'                |

## **GENERATION OF CONDITIONED MEDIA**

For generation of conditioned media for tube formation assays, BMMC were seeded at a density of  $2 \times 10^6$  cells/ml in serum free EBM2 medium containing 2 mM L-glutamine, 100 U/ml penicillin, 100 µg/ml streptomycin but no FCS or phenol-red. After treatment with or without 40 µM cromolyn for 30 min, the cells were centrifuged for 5 minutes at 200 x g and re-suspended in serum free EBM2 medium. After conditioning for 72 hours at 37°C and 5 % CO<sub>2</sub> in a humidified atmosphere, supernatants were filtered (0.2 µm) and stored at -20°C until use. Before tube formation assays, supernatants were concentrated 5-fold at 1000xg using Amicon Ultra-4 centrifugal filters (Merck KGaA, Darmstadt, Germany) with a molecular cutoff of 10 kDa and stored at -80°C until use.

Generation of conditioned media for proliferation assays was performed by seeding BMMC at a density of  $2 \times 10^6$  cells/ml in EBM2 medium containing 2 mM L-glutamine, 100 U/ml penicillin, 100 µg/ml streptomycin and 0.1 % FCS. After treatment with or without 40 µM cromolyn for 30 min, the cells were centrifuged for 5 minutes at 200 x g and re-suspended in EBM2 medium (0.1 % FCS). After conditioning for 12 hours at 37°C and 5 % CO<sub>2</sub> in a humidified atmosphere, supernatants were filtered (0.2 µm) and stored at -80°C until use.

For production of tumor-conditioned media, tumors were resected at day of sacrifice, weighed and cut into small pieces. Up to 800 mg of tumor tissue were rinsed in PBS and placed into a well of a 6-well plate. The tissues were covered with 3 ml EBM2 medium per well containing 2 mM L-glutamine, 100 U/ml penicillin, 100 µg/ml streptomycin but no FCS or phenol-red. The plate was incubated for 72 hours at 37°C and 5 % CO<sub>2</sub> in a humidified atmosphere. Afterwards, supernatants were taken and centrifuged for 5 minutes at 1000 x g at room temperature. Supernatants were filtered (0.2 µm) and stored at -80°C until use.

## **CO-CULTURES AND PROLIFERATION ASSAYS**

For co-cultivation of HUVEC, cells were starved for 24 h in serum-free medium (0.1 % FCS) and  $2 \times 10^4$  HUVEC were seeded in 400 µl serum-free medium into 24-wells and allowed to adhere for 3-5 hours. Medium was removed and  $1-5 \times 10^5$  BMMC or BMMC-conditioned

medium was added resulting in a final volume of 400  $\mu$ l serum-free medium (0.1 % FCS). Cells were plated in single and co-cultures with or without cell culture inserts and allowed to grow for 48 hours in 37°C and 5 % CO<sub>2</sub>. Cell proliferation was measured using Wst-1 proliferation reagent (Sigma-Aldrich, Taufkirchen, Germany).

### **TUBE FORMATION ASSAYS**

HUVEC were starved for 24 h in serum free EBM2 medium (0.1 % FCS). Thereafter, Geltrex matrix solution (Thermo Fisher Scientific Inc., Waltham, MA, USA) was thawed on ice and 50  $\mu$ l Geltrex/48-well were dispensed using precooled pipet tips. The plate was incubated for 30 minutes at 37°C and 5 % CO<sub>2</sub> during which matrix solidification occurred. Cells were detached from culture flask and  $2 \times 10^4$  HUVEC were seeded in 100  $\mu$ l serum-free EBM 2 medium (without FCS, without phenol red) on top of solidified matrices. Afterwards 100  $\mu$ l of sample were added per well and the plate was incubated overnight at 37°C and 5 % CO<sub>2</sub> with or without 0.5  $\mu$ g/mL anti-FGF2 antibody (clone bFM-1m, Merck KGaA., Darmstadt, Germany). For analysis of BMMC-mediated resistance to anti-angiogenic therapy, tube formation was induced with 100  $\mu$ l of BMMC-conditioned medium or 100 ng/ml VEGFA with or without 20  $\mu$ g/ml ramucirumab. On the next day, the medium was discarded and 200  $\mu$ l of culture medium with 0.2  $\mu$ g/ml calcein were added to each well. Samples were stained for 30 minutes at 37°C at 5 % CO<sub>2</sub> before pictures were taken. The pictures were analyzed with ImageJ (National Institute of Health, Washington, DC, USA) by counting vessel branches and nodules per mm<sup>2</sup>.

### **MIGRATION ASSAYS**

HUVEC were starved for 12 h in serum free EBM2 medium (0.1 % FCS) and  $2 \times 10^4$  cells were seeded into migration inserts (8  $\mu$ m pore size) of a 24-well plate. Subsequently,  $2 \times 10^5$  cells BMMC were seeded below the migration insert and the assays were incubated for 48 h at 37°C. Migration inserts were stained using the Diff Quick kit (Medion diagnostics, Miami, FL, USA) according to manufacturer's instructions. Non-migrated cells were removed with a cotton

swab before taking pictures. The pictures were analyzed with ImageJ (National Institute of Health, Washington, DC, USA) by counting migrated cells per mm<sup>2</sup>.

### **ECM MOBILIZATION ASSAY**

For ECM mobilization assays, the wells of a 24-well plate were coated with laminin (50 µg/ml), vitronectin (1 µg/ml), collagen (50 µg/ml) or 1 % BSA (control) for 24 h. Wells were rinsed three times with PBS and unspecific protein binding was blocked with 500 µl 1 % BSA in PBS for 1 h at RT before matrices were incubated with 300 µl of FGF1 or GM-CSF (25 ng/ml) for 8 h. Spiked matrices were washed three times with PBS and incubated for with 300 µl BMMC-conditioned medium (WT or *Gzmb* KO) or serum free medium over night. On the next day, supernatants were harvested and the remaining ECM was lysed in RIPA buffer. FGF-1 and GM-CSF level in supernatants and matrices were determined by ELISA according to manufacturer's instructions (R&D Systems, Minneapolis, MN, USA).

### **HISTOLOGY**

At the day of sacrifice, tumor samples were fixed overnight in 4 % paraformaldehyde at 4°C prior to paraffin embedding. Paraffin blocks were cut into 4 µm sections and stained for CD31 (clone BAF1865, R&D Systems, Minneapolis, MN, USA), BrdU (clone BU1/75, Bio-Rad AbD Serotec GmbH, Puchheim, Germany), Pimonidazole (clone pAAb2627AP, Hypoxyprobe Ltd., Burlington, MA, USA), endoglin (polyclonal, R&D Systems, Minneapolis, MN, USA), granzyme b (polyclonal, R&D Systems, Minneapolis, MN, USA) or tryptase (clone EPR8476, Abcam plc, Cambridge, UK) as described before<sup>5,6</sup>.



## SUPPLEMENTARY REFERENCES

- 1 Lyon, M. F. & Glenister, P. H. A new allele sash (Wsh) at the W-locus and a spontaneous recessive lethal in mice. *Genetical research* **39**, 315-322 (1982).
- 2 Kalesnikoff, J. & Galli, S. J. Antiinflammatory and immunosuppressive functions of mast cells. *Methods in molecular biology* **677**, 207-220, doi:10.1007/978-1-60761-869-0\_15 (2011).
- 3 Weber, K., Mock, U., Petrowitz, B., Bartsch, U. & Fehse, B. Lentiviral gene ontology (LeGO) vectors equipped with novel drug-selectable fluorescent proteins: new building blocks for cell marking and multi-gene analysis. *Gene therapy* **17**, 511-520, doi:10.1038/gt.2009.149 (2010).
- 4 Weber, K., Bartsch, U., Stocking, C. & Fehse, B. A multicolor panel of novel lentiviral "gene ontology" (LeGO) vectors for functional gene analysis. *Molecular therapy : the journal of the American Society of Gene Therapy* **16**, 698-706, doi:10.1038/mt.2008.6 (2008).
- 5 Fischer, C. *et al.* Anti-PIGF inhibits growth of VEGF(R)-inhibitor-resistant tumors without affecting healthy vessels. *Cell* **131**, 463-475, doi:10.1016/j.cell.2007.08.038 (2007).
- 6 Mazzone, M. *et al.* Heterozygous deficiency of PHD2 restores tumor oxygenation and inhibits metastasis via endothelial normalization. *Cell* **136**, 839-851, doi:10.1016/j.cell.2009.01.020 (2009).
